# Supplementary material for: Strong purifying selection in endogenous retroviruses in the saltwater crocodile (Crocodylus porosus) in the Northern Territory of Australia
Source: PubMed Central journal article supplement (PMC3531266; doi:10.1186/1759-8753-3-20), 2012-12-05
Supplement: 1759-8753-3-20-S1.pdf [file 1759-8753-3-20-S1.pdf]

# **Strong purifying selection in endogenous retroviruses in the saltwater crocodile (*Crocodylus porosus*) in the Northern Territory of Australia: Additional File 1**

This file contains:

Supplementary Figure 1

Supplementary Figure 2

Supplementary Table 1

Supplementary Table 2

Supplementary Figures

(a)

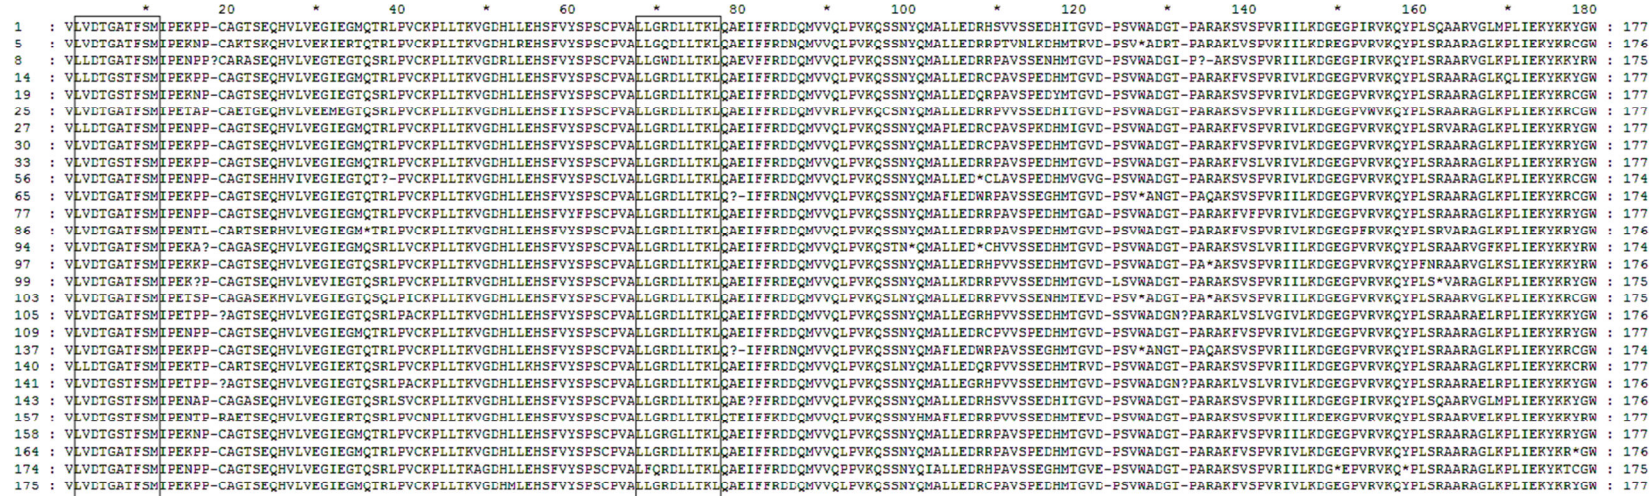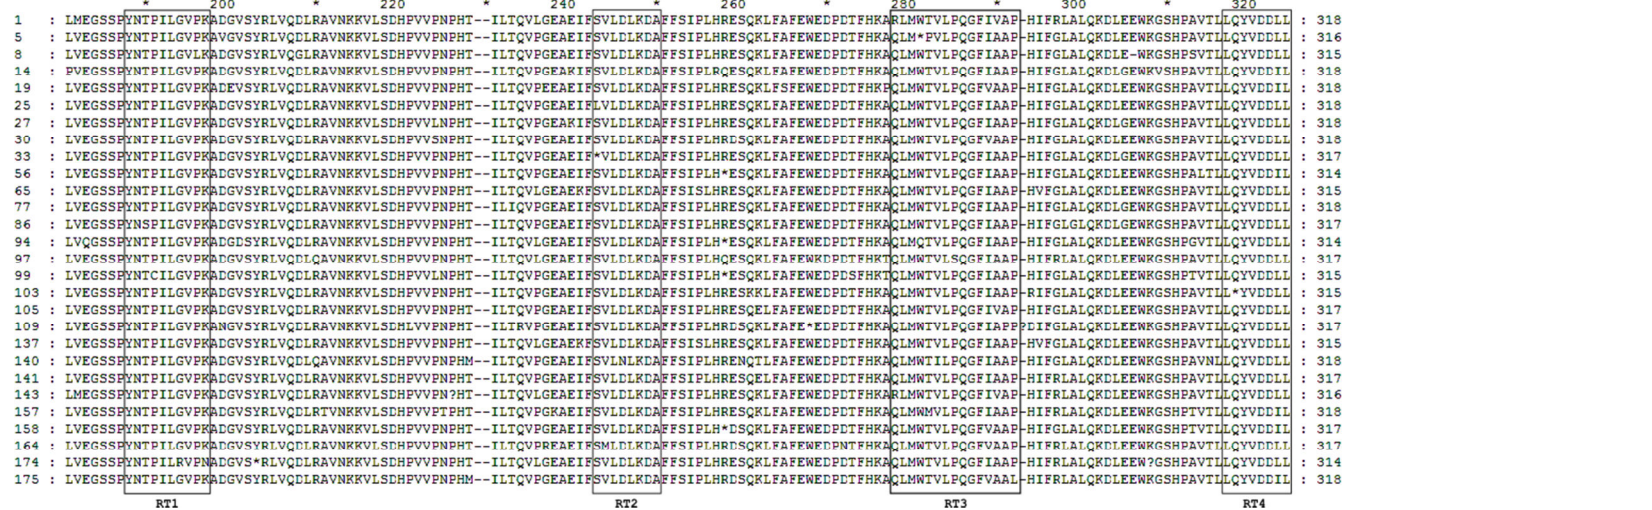





(a)

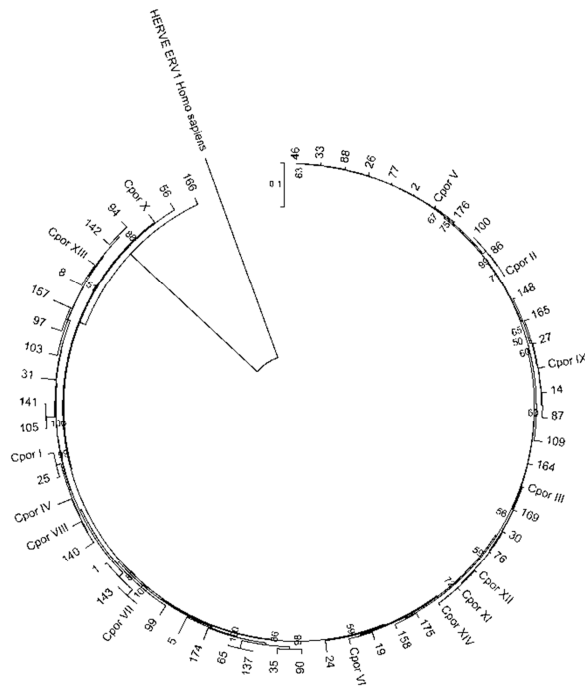

(b)

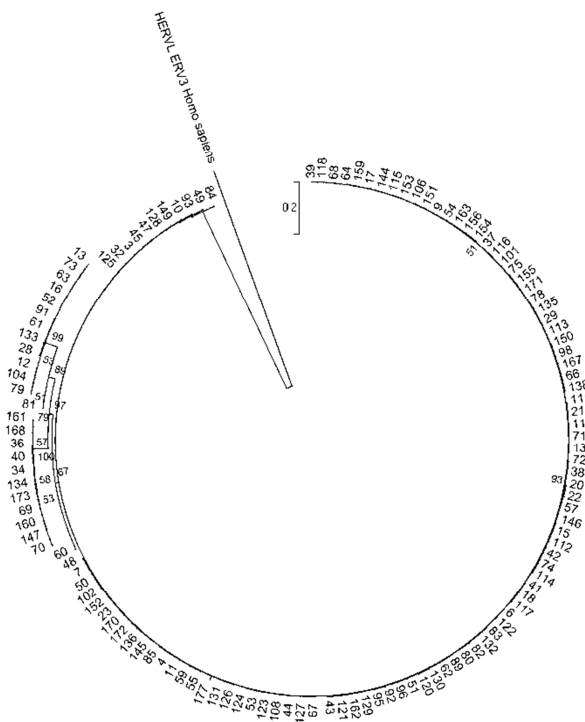

**Supplementary Figure 2:** Neighbour joining trees based on the nucleotide alignments of *C. porosus* sequences from the CERV1 (a) and CERV2 (b) clades. Outgroups are human ERV sequences extracted from the Reptbase database and from the same general ERV classes as these sequences. Numbers outside the circles indicate the haplotypes included in each tree. Smaller numbers within the circle represent bootstrap support values greater than 50%.

## Supplementary Tables

**Supplementary Table 1:** Predicted recombinant and parental sequences as determined by RDP

| Recombinant Sequence | Breakpoint Positions |     | Major Parental Sequence <sup>a</sup> | Minor Parental Sequence <sup>b</sup> | Probability that the detected sequence is a recombinant <sup>c</sup> |          |          |        |          |        |        |
|----------------------|----------------------|-----|--------------------------------------|--------------------------------------|----------------------------------------------------------------------|----------|----------|--------|----------|--------|--------|
|                      | Begin                | End |                                      |                                      | RDP                                                                  | GENECONV | Bootscan | Maxchi | Chimaera | SiScan | 3Seq   |
| CERV1-All            |                      |     |                                      |                                      |                                                                      |          |          |        |          |        |        |
| 1                    | 289                  | 906 | 148                                  | Cpor_VII                             | 0.0230                                                               | NS       | 0.0234   | 0.0001 | 0.0107   | 0.0000 | 0.0000 |
| Csia_IV              | 753                  | 872 | 164                                  | 142                                  | 0.0301                                                               | NS       | 0.0306   | NS     | NS       | NS     | 0.0344 |
| Cnil_I               |                      |     | 164                                  | 142                                  | Trace evidence only                                                  |          |          |        |          |        |        |
| CERV1-porosus        |                      |     |                                      |                                      |                                                                      |          |          |        |          |        |        |
| 1                    | 289                  | 869 | 175                                  | Cpor_VII                             | 0.0005                                                               | NS       | 0.0005   | 0.0001 | 0.0021   | NS     | 0.0000 |
| CERV2-All            |                      |     |                                      |                                      |                                                                      |          |          |        |          |        |        |
| 81                   | 23                   | 296 | 53                                   | 52                                   | 0.0001                                                               | 0.0020   | 0.0001   | 0.0001 | 0.0001   | 0.0000 | 0.0000 |
| Amis_II              | 698                  | 1   | Asin_IV                              | Ppal_II                              | 0.0398                                                               | NS       | NS       | NS     | NS       | NS     | 0.0215 |
| Amis_I               |                      |     | Asin_IV                              | Ppal_II                              | Trace evidence only                                                  |          |          |        |          |        |        |
| CERV2-porosus        |                      |     |                                      |                                      |                                                                      |          |          |        |          |        |        |
| 81                   | 23                   | 296 | 53                                   | 52                                   | 0.0001                                                               | 0.0013   | 0.0001   | 0.0001 | 0.0001   | 0.0000 | 0.0000 |
| 60                   | 16                   | 191 | 162                                  | 34                                   | 0.0329                                                               | NS       | NS       | NS     | NS       | NS     | 0.0003 |

<sup>a</sup> Major Parent: Parent contributing the larger fraction of sequence

<sup>b</sup> Minor Parent: Parent contributing the smaller fraction of sequence

<sup>c</sup> NS: No significant P-value was recorded for this recombination event using this method

**Supplementary Table 2:** PAML analysis showing parameter estimates, average  $d_N/d_S$ , and significance of the pairwise test comparisons

| $H_n$        | Model                   | Average $d_N/d_S$ | PAML parameter estimates                                                                                           | lnL        | LRT test statistic | df | p value |
|--------------|-------------------------|-------------------|--------------------------------------------------------------------------------------------------------------------|------------|--------------------|----|---------|
| <b>CERV1</b> |                         |                   |                                                                                                                    |            |                    |    |         |
| H0           | M0: One ratio           | 0.4904            | $\omega = 0.49042$                                                                                                 | -6936.0525 | 273.3946           | 4  | < 0.001 |
| H1           | M3: Discrete            | 0.5187            | $p_0 = 0.63002$ $p_1 = 0.36034$ $p_2 = 0.00964$<br>$\omega_0 = 0.14883$ $\omega_1 = 0.97228$ $\omega_2 = 7.73167$  | -6799.3552 |                    |    |         |
| H2           | M1a: Nearly neutral     | 0.4344            | $p_0 = 0.66860$ $p_1 = 0.33140$ $p_2 = 0.00962$<br>$\omega_0 = 0.15403$ $\omega_1 = 1.00000$                       | -6845.3939 | 92.0213            | 2  | < 0.001 |
| H3           | M2a: Positive selection | 0.5234            | $p_0 = 0.64094$ $p_1 = 0.34945$ $p_2 = 0.00962$<br>$\omega_0 = 0.15461$ $\omega_1 = 1.00000$ $\omega_2 = 7.78576$  | -6799.3832 |                    |    |         |
| H4           | M7: Beta                | 0.4217            | $p = 0.37192$ $q = 0.50996$                                                                                        | -6848.2309 | 96.8512            | 2  | < 0.001 |
| H5           | M8: Beta & $\omega$     | 0.4973            | $p_0 = 0.99019$ $p = 0.40522$ $q = 0.54097$<br>( $p_1 = 0.00981$ ) $\omega = 7.46662$                              | -6799.8053 |                    |    |         |
| <b>CERV2</b> |                         |                   |                                                                                                                    |            |                    |    |         |
| H0           | M0: One ratio           | 0.5539            | $\omega = 0.55393$                                                                                                 | -4029.5600 | 413.1006           | 4  | < 0.001 |
| H1           | M3: Discrete            | 0.6898            | $p_0 = 0.79438$ $p_1 = 0.18634$ $p_2 = 0.01928$<br>$\omega_0 = 0.14019$ $\omega_1 = 1.66189$ $\omega_2 = 13.93868$ | -3823.0097 |                    |    |         |
| H2           | M1a: Nearly neutral     | 0.3057            | $p_0 = 0.76252$ $p_1 = 0.23748$<br>$\omega_0 = 0.08951$ $\omega_1 = 1.00000$                                       | -3921.6374 | 178.2283           | 2  | < 0.001 |
| H3           | M2a: Positive selection | 0.5864            | $p_0 = 0.72223$ $p_1 = 0.25559$ $p_2 = 0.02218$<br>$\omega_0 = 0.10433$ $\omega_1 = 1.00000$ $\omega_2 = 11.51932$ | -3832.5232 |                    |    |         |
| H4           | M7: Beta                | 0.3349            | $p = 0.17755$ $q = 0.35268$                                                                                        | -3923.0792 | 164.9022           | 2  | < 0.001 |
| H5           | M8: Beta & $\omega$     | 0.6217            | $p_0 = 0.97733$ $p = 0.21801$ $q = 0.39323$<br>( $p_1 = 0.02267$ ) $\omega = 12.04341$                             | -3840.6281 |                    |    |         |
